# Supplementary material for: A novel electrochemical sensing platform based on the esterase extracted from kidney bean for high-sensitivity determination of organophosphorus pesticides
Source: Royal Society of Chemistry journal article supplement (doi:10.1039/d1ra08129b), 2022-01-01
Supplement: d1ra08129b1.pdf [file d1ra08129b1.pdf]

## Supporting Information

### **A novel electrochemical sensing platform based on the esterase extracted from kidney bean for high-sensitivity determination of organophosphorus pesticide**

Han Tao,<sup>\*a, b</sup> Feng Liu,<sup>a, b</sup> Chun Ji,<sup>c</sup> Yuangen Wu,<sup>a, b</sup> Xiao Wang<sup>a, b</sup> and Qingli Shi<sup>a, b</sup>

<sup>a</sup>School of Liquor and Food Engineering, Guizhou University, Guiyang 550025, China.

<sup>b</sup>Key Laboratory of Fermentation Engineering and Biopharmacy of Guizhou Province, Guizhou University, Guiyang 550025, China.

<sup>c</sup>School of Pharmaceutical Sciences, Guizhou University, Guiyang 550025, China.

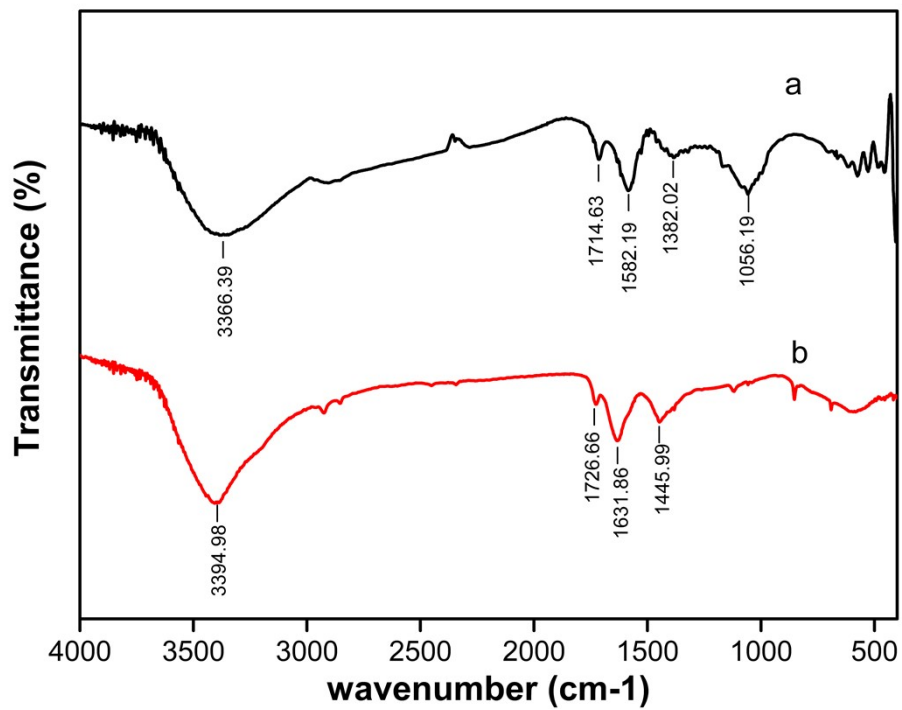

**Figure S1.** FTIR spectra of (a) cGR, and (b) cCNTs

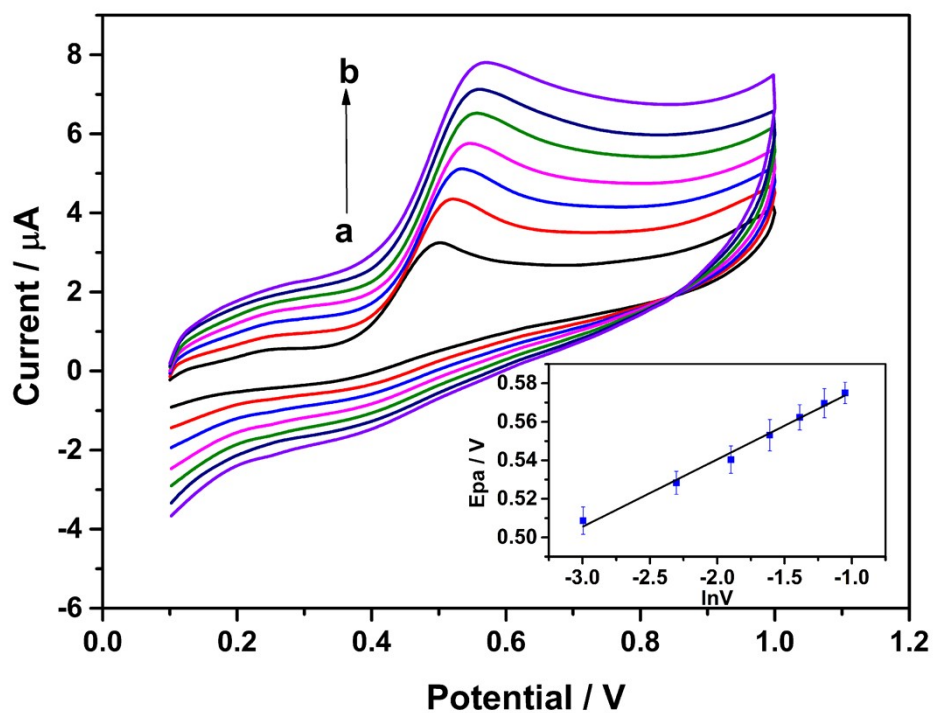

**Figure S2.** CV curves of CS/KbE/PDDA-Au/cCNTs-cGR /GCE at different scan rates in PBS buffer containing 0.8mM  $\alpha$ -NA (a-f: 0.05, 0.1, 0.15, 0.2, 0.25, 0.3, 0.35V/s). Inset: the linear relationship between  $E_{pa}$  and  $\ln v$

**Table S1** Comparison of the KbE biosensor for trichlorfon detection with other electrochemical

## sensors

| Electrode <sup>a</sup>                                    | Linear range ( $\mu\text{g/L}$ )                                                            | LOD ( $\text{ng/L}$ ) | Ref       |
|-----------------------------------------------------------|---------------------------------------------------------------------------------------------|-----------------------|-----------|
| graphite rods/poly(FBThF)/f-MNPs/AChE                     | 0.05~4.1, 4.1~9.0                                                                           | 37                    | 1         |
| GCE/MWCNTs@Au-g-PMAEFC                                    | 12.87~25.74                                                                                 | 7000                  | 2         |
| GCE/CS/Fe <sub>3</sub> O <sub>4</sub> @MWNT-COOH/MIP      | $2.57 \times 10^{-3} \sim 2.57 \times 10^3$                                                 | 2.3                   | 3         |
| NECFE/Cu-hemin MOFs/AChE                                  | 0.25~20.00                                                                                  | 82.0                  | 4         |
| GCE/AChE//Ag-rGO-NH <sub>2</sub> /poly (FBThF)            | 0.0206~2.06                                                                                 | 1.0                   | 5         |
| GCE/3D-KSC/COF-LZU1/AChE                                  | 0.20~19.00                                                                                  | 67.0                  | 6         |
| GCE/MIL-53(Al)@CdS-PEI/CS/SiO <sub>2</sub> @AuNPs-aptamer | $2.57 \times 10^{-3} \sim 2.57 \times 10^4$                                                 | 1.3                   | 7         |
| GCE/nanogold/mercaptomethamidophos /mercaptohexanol/AChE  | 0.10~1500                                                                                   | 21.0                  | 8         |
| GCE/cCNTs-cGR/PDDA-Au/KbE/CS                              | $5 \times 10^{-3} \sim 1.50 \times 10^{-1}$ , $1.50 \times 10^{-1} \sim 7.0 \times 10^{-1}$ | 3.0                   | This work |

<sup>a</sup> FBThF, 4,7-di(furan-2-yl)benzo[c][1,2,5]-thiadiazole; f-MNPs, carboxyl group modified magnetic nanoparticles; MWCNTs@Au-g-PMAEFC, multi-walled carbon nanotubes decorated with gold nanoparticles-grafted poly(2-methacryloyloxyethyl ferrocenecarboxylate); CS, chitosan; MWNT-COOH, carboxyl-functionalized multiwalled carbon nanotubes; MIP, molecularly imprinted polymer; NECF, nitrogen-containing melamine carbon foam; FBThF, 4, 7-di (furan-2-yl) benzo thiadiazole ; COF-LZU1, covalent-organic framework with high carbon and nitrogen content microstructures; 3D-KSCs, 3D nitrogen-containing kenaf stem composites; PEI, polyethylenimine; AuNPs, gold nanoparticles.

**Table S2** Comparison of the KbE biosensor for trichlorfon detection with other analytical

methods

| Method <sup>b</sup>         | Linear range (µg/L)                                                                      | LOD (ng/L) | Ref       |
|-----------------------------|------------------------------------------------------------------------------------------|------------|-----------|
| Fluorescence assay          | 0.01~ 32.00                                                                              | 4.7        | 9         |
| Photonic crystal biosensor  | $2.57 \times 10^{-6} \sim 2.57 \times 10^4$                                              | 0.002      | 10        |
| Quartz crystal microbalance | 0.00~250.00                                                                              | 4630       | 11        |
| Fluorescence assay          | $1 \times 10^{-1} \sim 1 \times 10^4$                                                    | 72.2       | 12        |
| GC-MS                       | 2.00~500.00                                                                              | 580.0      | 13        |
| UHPLC- MS                   | --                                                                                       | 2.0        | 14        |
| electrochemistry            | $5 \times 10^{-3} \sim 1.50 \times 10^{-1}, 1.50 \times 10^{-1} \sim 7.0 \times 10^{-1}$ | 3.0        | This work |

<sup>b</sup>GC-MS, gas chromatography/mass spectrometry; UHPLC-MS, Ultra-High-Performance Liquid Chromatography-Q/Orbitrap Mass Spectrometry.

## References

1. H. D. Cancar, S. Soylemez, Y. Akpınar, M. Kesik, S. Goker, G. Gunbas, M. Volkan and L. Toppare, *Acs Applied Materials & Interfaces*, 2016, **8**, 8058-8067.
2. X. P. Wei, R. Q. Zhang, L. B. Wang, Y. L. Luo, F. Xu and Y. S. Chen, *Journal of Materials Chemistry C*, 2019, **7**, 119-132.
3. Q. H. Tang, X. J. Shi, X. L. Hou, J. Zhou and Z. X. Xu, *Analyst*, 2014, **139**, 6406-6413.
4. Y. G. Song, B. X. Shan, B. W. Feng, P. F. Xu, Q. Zeng and D. Su, *Rsc Advances*, 2018, **8**, 27008-27015.
5. P. Zhang, T. T. Sun, S. Z. Rong, D. D. Zeng, H. W. Yu, Z. Zhang, D. Chang and H. Z. Pan, *Bioelectrochemistry*, 2019, **127**, 163-170.
6. Y. L. Liu, M. Y. Zhou, C. Jin, J. X. Zeng, C. Huang, Q. Y. Song and Y. G. Song, *Frontiers in Chemistry*, 2020, **8**.
7. D. F. Feng, F. C. Wei, Y. Y. Wu, X. C. Tan, F. Li, Y. K. Lu, G. C. Fan and H. Y. Han, *Analyst*, 2021, **146**, 1295-1302.
8. G. Z. Zhao, B. H. Zhou, X. W. Wang, J. Shen and B. Zhao, *Food Chem.*, 2021, **354**.
9. Y. M. Shen, F. M. Yan, X. Huang, X. Y. Zhang, Y. Y. Zhang, C. X. Zhang, J. L. Jin, H. T. Li and S. Z. Yao, *Rsc Advances*, 2016, **6**, 88096-88103.
10. F. L. Qi, Y. H. Lan, Z. H. Meng, C. X. Yan, S. G. Li, M. Xue, Y. F. Wang, L. L. Qiu, X. He and X. Y. Liu, *Rsc Advances*, 2018, **8**, 29385-29391.
11. H. Dayal, W. Y. Ng, X. H. Lin and S. F. Y. Li, *Sensors and Actuators B-Chemical*, 2019, **300**.

12. M. D. Jiang, C. Chen, J. B. He, H. Y. Zhang and Z. X. Xu, *Food Chem.*, 2020, **307**.
13. P. Sun, Y. L. Gao, C. Xu and Y. F. Lian, *Rsc Advances*, 2018, **8**, 10277-10283.
14. S. Y. Wang, E. K. Fodjo, C. Kong and H. J. Yu, *Water*, 2020, **12**.
